# Supplementary material for: Formin-like 1 (FMNL1) Is Associated with Glioblastoma Multiforme Mesenchymal Subtype and Independently Predicts Poor Prognosis
Source: MDPI journal article supplement (doi:10.3390/ijms20246355), 2019-12-17
Supplement: s1 [file s1]

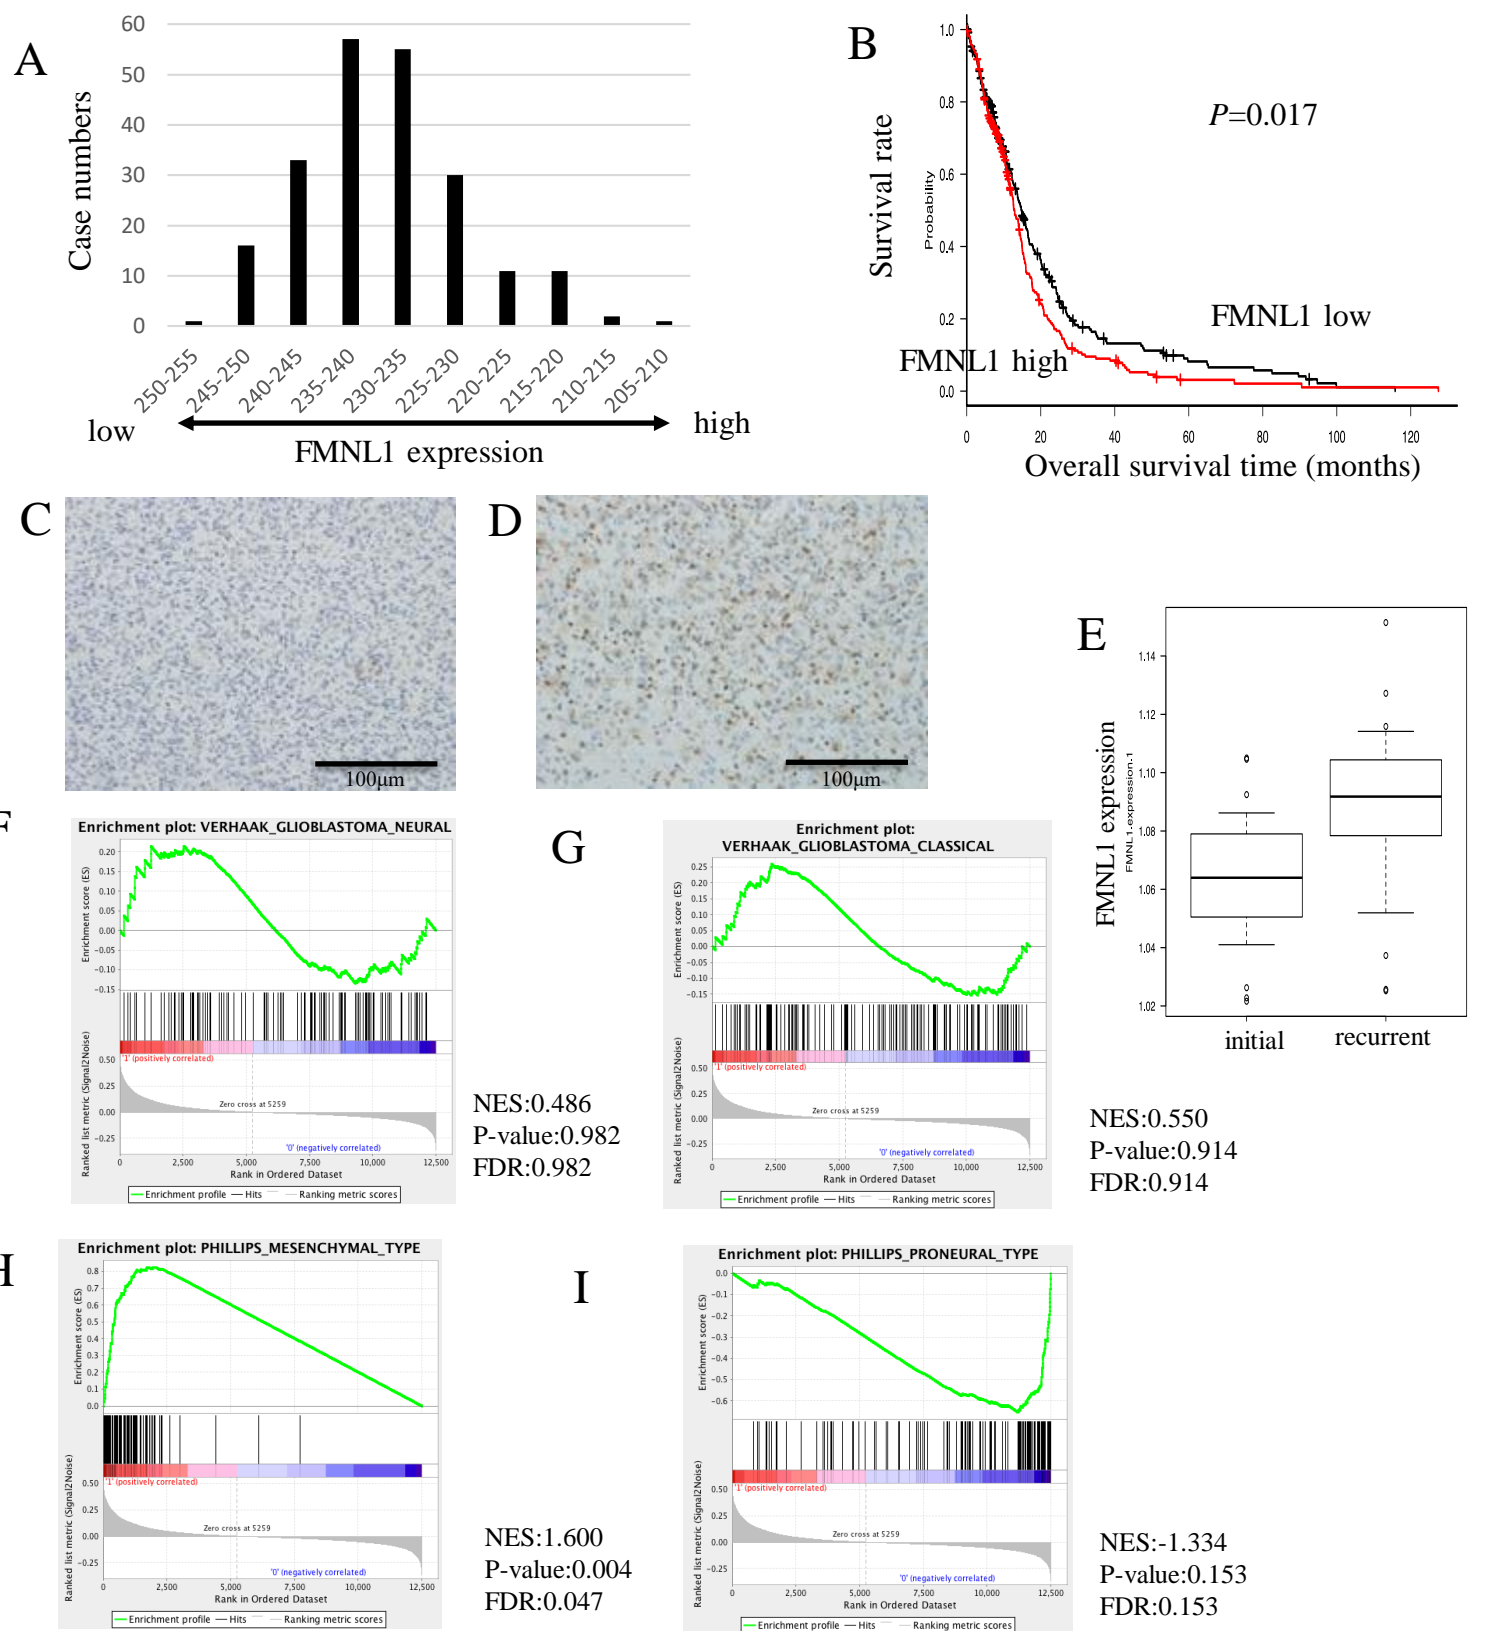

## Supplementary Figure S1.

**A**, The distribution plot of FMNL1 immunohistochemical expression levels. **B**, Kaplan-Meier analysis of overall survival in TCGA GBM patients high or low expressing FMNL1. The former exhibited significantly poorer prognoses than the latter ( $P = 0.017$ ). **C-E**, Representative immunohistochemical staining for FMNL1 in a primary (C) and recurrent tumour (D) are shown, and were compared by paired t-test ( $P < 0.01$ , E). **F-I**, Enrichment plot of FMNL1 mRNA expression in GBM specimens from TCGA for the gene sets VERHAAK\_GLIOBLASTOMA\_CLASSICAL, VERHAAK\_GLIOBLASTOMA\_NEURAL, PHILLIPS\_GLIOBLASTOMA\_MESENCHYMAL, and PHILLIPS\_GLIOBLASTOMA\_PRONEURAL. NES, normalized enrichment score; P, nominal P-value; FDR, False discovery rate.

## U87MG

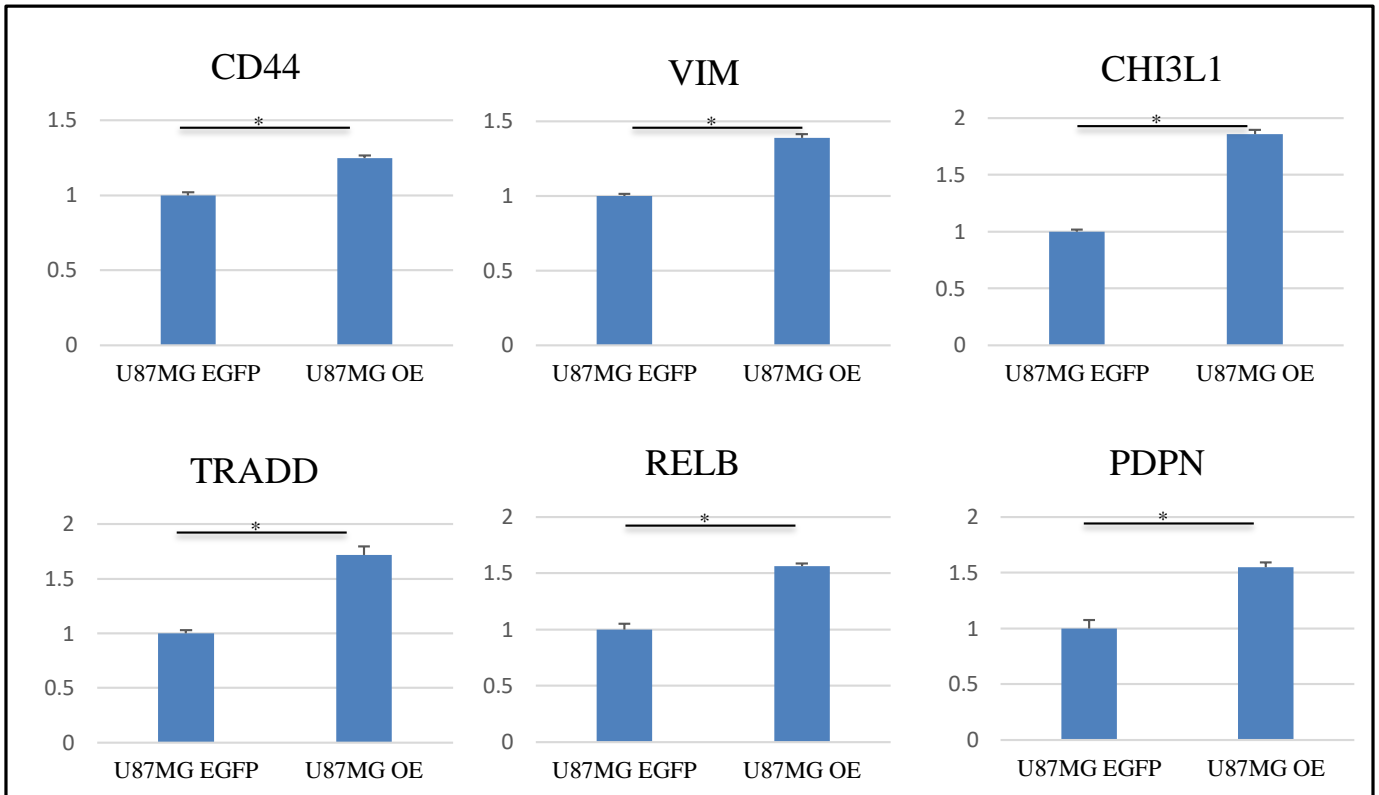

## KNS81

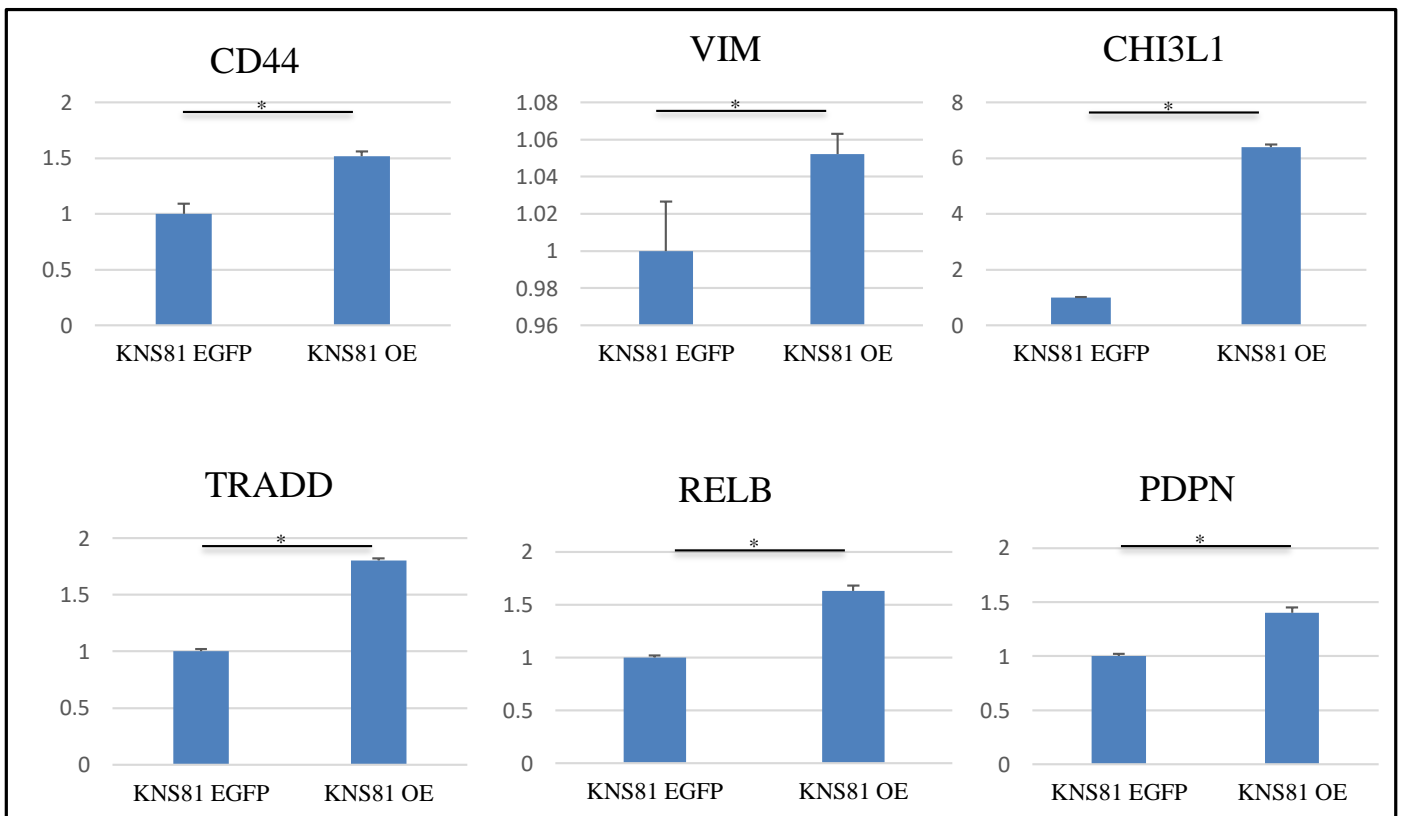

## Supplementary Figure S2.

FMNL1 induces mesenchymal markers expression. Mesenchymal markers, measured by RT-PCR, were significantly upregulated in U87MG and KNS81 cells overexpressing FMNL1, compared with cells overexpressing EGFP.  $*P < 0.01$

## U251MG

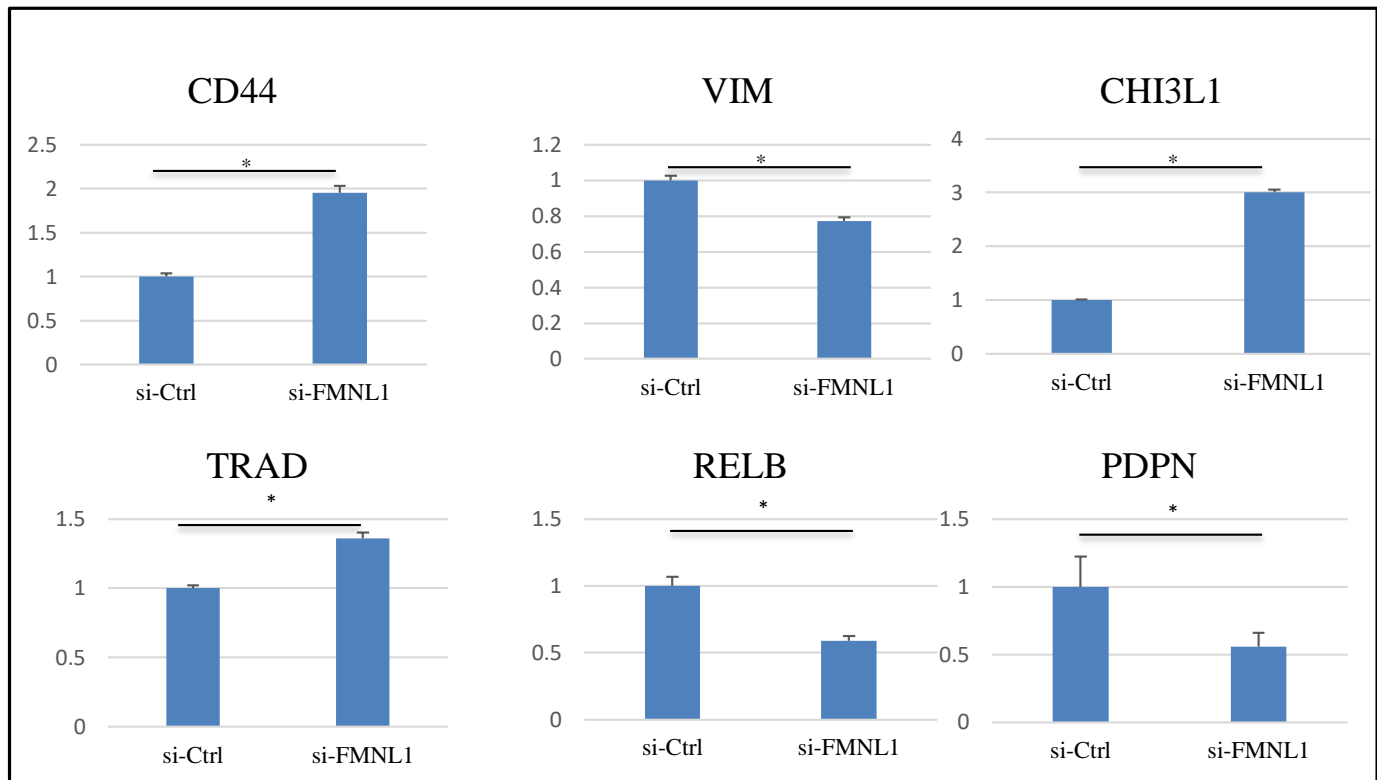

## DBTR-05MG

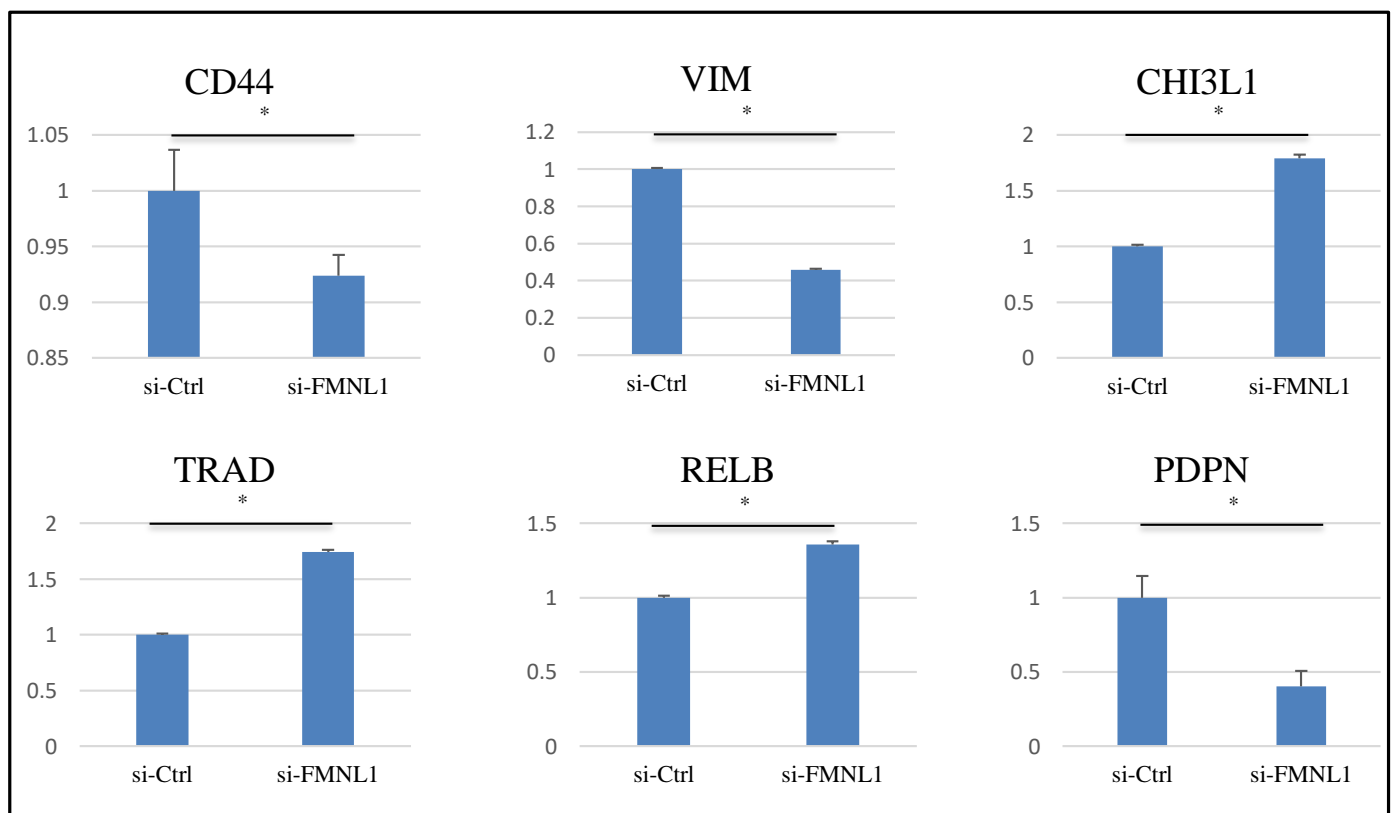

## Supplementary Figure S3.

FMNL1 knockdown effect on mesenchymal markers.  $*P < 0.01$

## U251MG

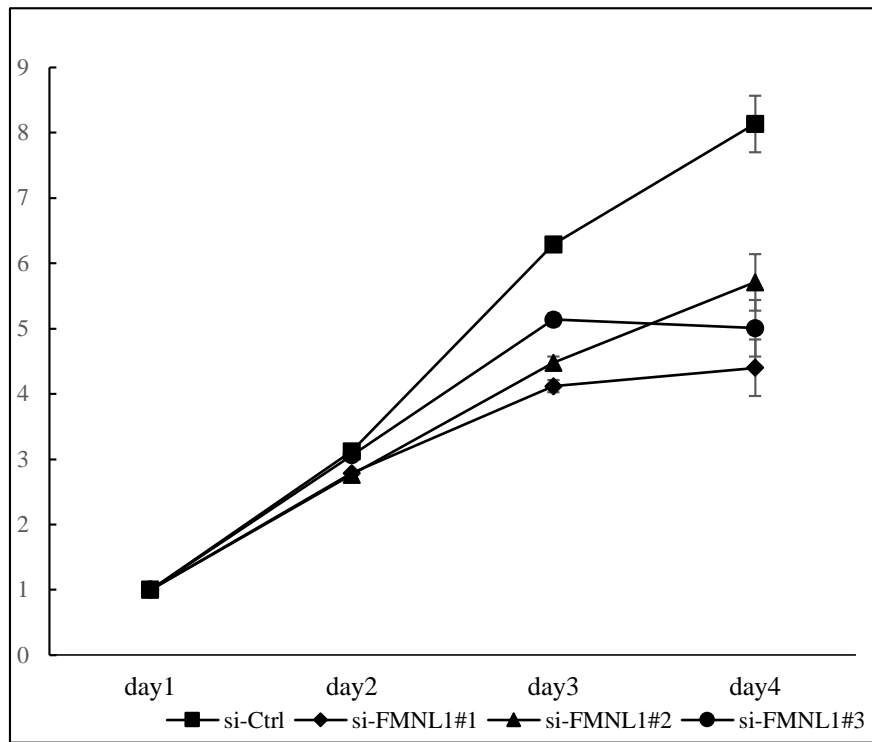

## DBTRG-05MG

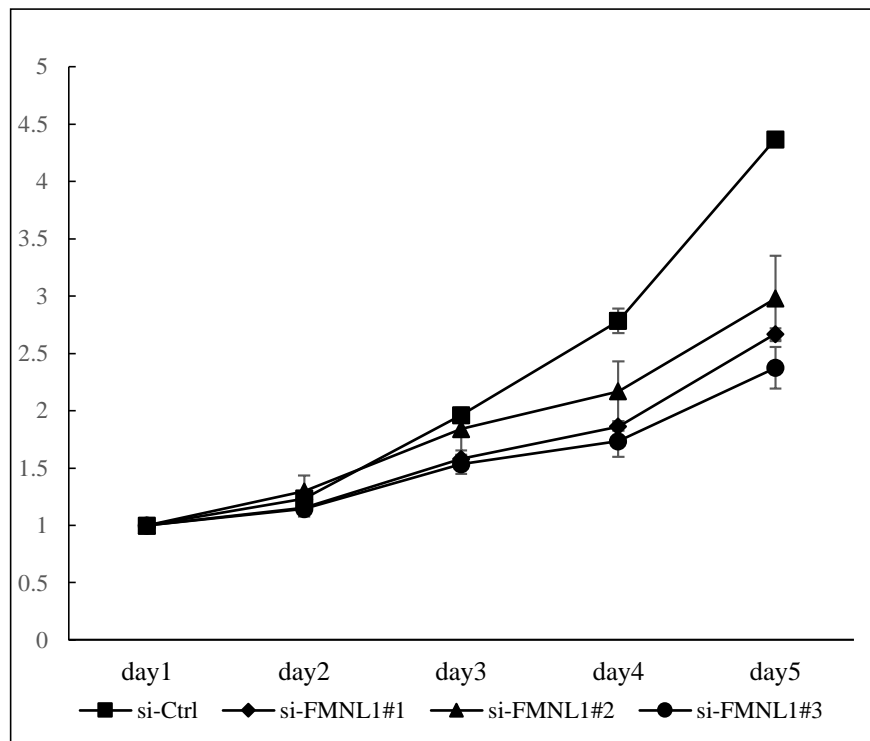

### Supplementary Figure S4.

FMNL1 knockdown effect on GBM cell proliferation.  
Cell viability was measured using the MTT assay.

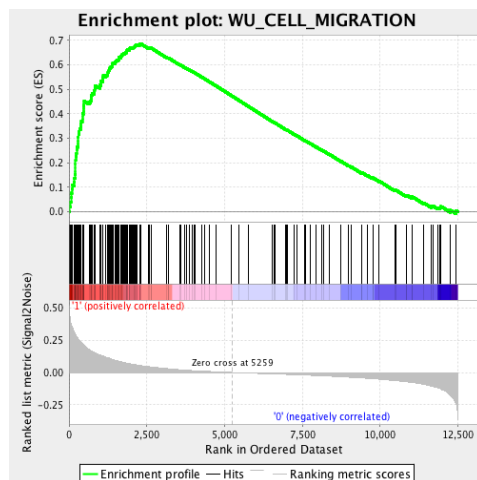

NES:1.616  
P-value:0.0  
FDR:0.054

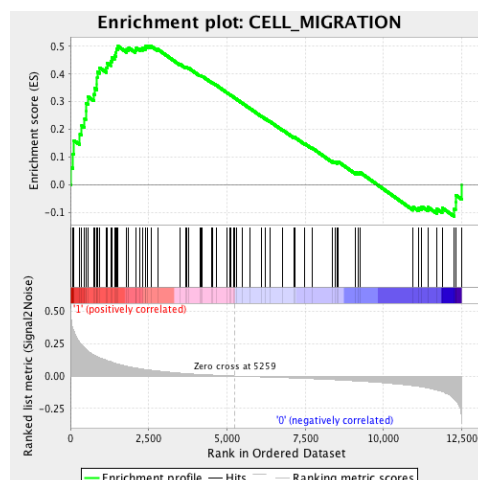

NES:1.522  
P-value:0.014  
FDR:0.053

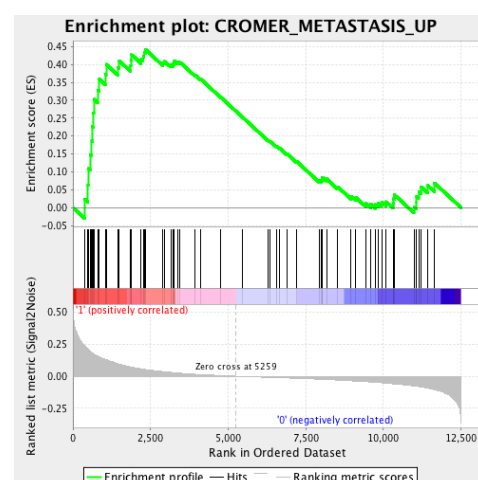

NES:1.623  
P-value:0.014  
FDR:0.053

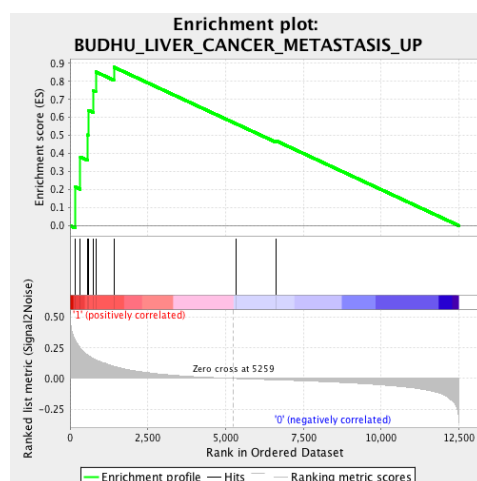

NES:1.553  
P-value:0.004  
FDR:0.052

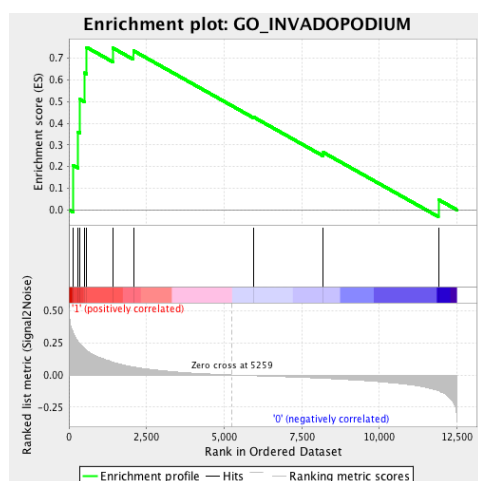

NES:1.388  
P-value:0.068  
FDR:0.108

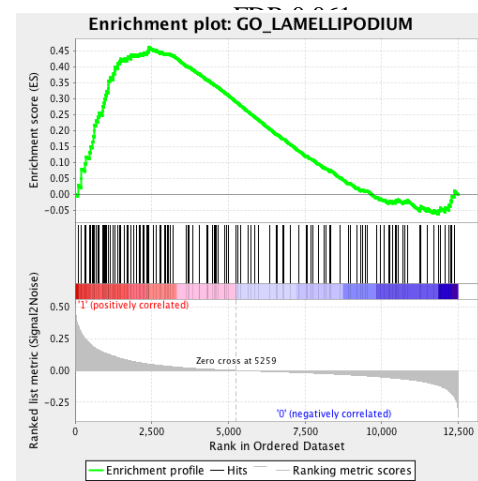

NES:1.600  
P-value:0.011  
FDR:0.053

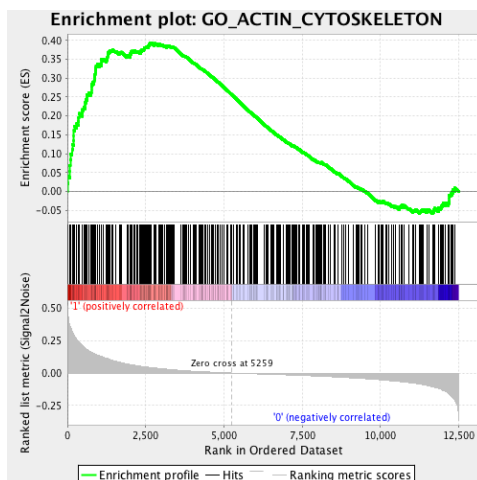

NES:1.556  
P-value:0.002  
FDR:0.055

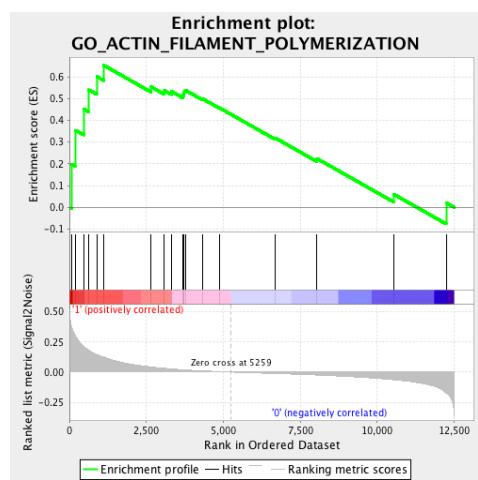

NES:1.682  
P-value:0.015  
FDR:0.015

## Supplementary Figure S5.

Enrichment plot of FMNL1 mRNA expression in TCGA GBM patients for the gene sets GO\_LAMELLIPODIUM, KEGG\_FOCAL\_ADHESION, GO\_INVADOPODIUM, BUDHU\_LIVER\_CANCER\_METASTASIS\_UP, CROMER\_METASTASIS\_UP, CELL\_MIGRATION, WU\_CELL\_MIGRATION, GO\_ACTIN\_CYTOSKELETON, and GO\_ACTIN\_FILAMENT\_POLYMERIZATION. NES, normalized enrichment score; P, nominal *P*-value; FDR, false discovery rate.
