# Supplementary material for: Formin-like 1 (FMNL1) Is Associated with Glioblastoma Multiforme Mesenchymal Subtype and Independently Predicts Poor Prognosis
Source: MDPI journal article supplement (doi:10.3390/ijms20246355), 2019-12-17
Supplement: s1 [file s1]

Relationship between FMNL1 expression and clinical GBM features

|                              |                        | FMNL1 expression |      |            |      |            |      | P-value |
|------------------------------|------------------------|------------------|------|------------|------|------------|------|---------|
|                              |                        | Total n=217      | %    | High n=109 | %    | Low n=108  | %    |         |
| Age(mean±SD)                 |                        | 64.92±15.12      |      | 67.7±13.93 |      | 62.1±15.87 |      | 0.006   |
| Gender                       | Male                   | 122              | 56.2 | 66         | 60.6 | 56         | 51.9 | 0.219   |
|                              | Female                 | 95               | 43.8 | 43         | 39.4 | 52         | 48.1 |         |
| Location                     | Dominant side          | 98               | 45.2 | 53         | 48.6 | 45         | 41.7 | 0.129   |
|                              | Non-dominant side      | 89               | 41.0 | 37         | 33.9 | 52         | 48.1 |         |
|                              | Bilateral              | 27               | 12.4 | 17         | 15.6 | 10         | 9.30 |         |
|                              | Posterior fossa        | 3                | 1.40 | 2          | 1.80 | 1          | 0.90 |         |
| Karnofsky performance status |                        |                  |      |            |      |            |      | 0.039   |
|                              | 0-70                   | 128              | 59.0 | 72         | 66.1 | 56         | 51.9 |         |
|                              | 80-100                 | 89               | 41.0 | 37         | 33.9 | 52         | 48.1 |         |
| Extent of surgical resection |                        |                  |      |            |      |            |      | 0.010   |
|                              | Total+subtotal removal | 119              | 54.8 | 50         | 45.9 | 69         | 63.9 |         |
|                              | Partial removal+biopsy | 98               | 45.2 | 59         | 54.1 | 39         | 36.1 |         |
| Number of surgeries          |                        |                  |      |            |      |            |      | <0.001  |
|                              | Single                 | 185              | 85.3 | 104        | 95.4 | 81         | 75.0 |         |
|                              | Multiple               | 32               | 14.7 | 5          | 4.60 | 27         | 25.0 |         |

Groups were compared by  $\chi^2$  test with P < 0.05 considered statistically significant.

Supplementary Table S1

| <b>Gene</b>   | <b>Forward sequence</b> | <b>Reverse sequence</b> |
|---------------|-------------------------|-------------------------|
| <b>GAPDH</b>  | TGCACCACCAACTGCTTAG     | GAGGCAGGGATGATGTTC      |
| <b>FMNL1</b>  | GGTCCTCCTGATGCCCTAGGAA  | TGTGAAGACAGTGCCGGTGA    |
| <b>CHI3L1</b> | CTCAAGAACAGGAACCCCAA    | TCTGGGTGTTGGAGGCTATC    |
| <b>CD44</b>   | CTGATCATCTTGGCATCCCT    | AGCTTTTTTCTTCTGCCCACA   |
| <b>VIM</b>    | TGCCCTTAAAGGAACCAATG    | GCTTCAACGGCAAAGTTCTC    |
| <b>RELB</b>   | CAGCCTCGTGGGGAAAGAC     | GCCCAGGTTGTTAAAACTGTGC  |
| <b>TRADD</b>  | GCTGTTTGAGTTGCATCCTAGC  | CCGCACTTCAGATTTCGCA     |
| <b>PDPN</b>   | ACCAGTCACTCCACGGAGAAA   | GGTCACTGTTGACAAACCATCT  |

Supplementary Table S2
